# Supplementary material
Source: PubMed Central journal article supplement (PMC10643610)
Supplement: 11357_2023_963_MOESM1_ESM.pdf [file 11357_2023_963_MOESM1_ESM.pdf]

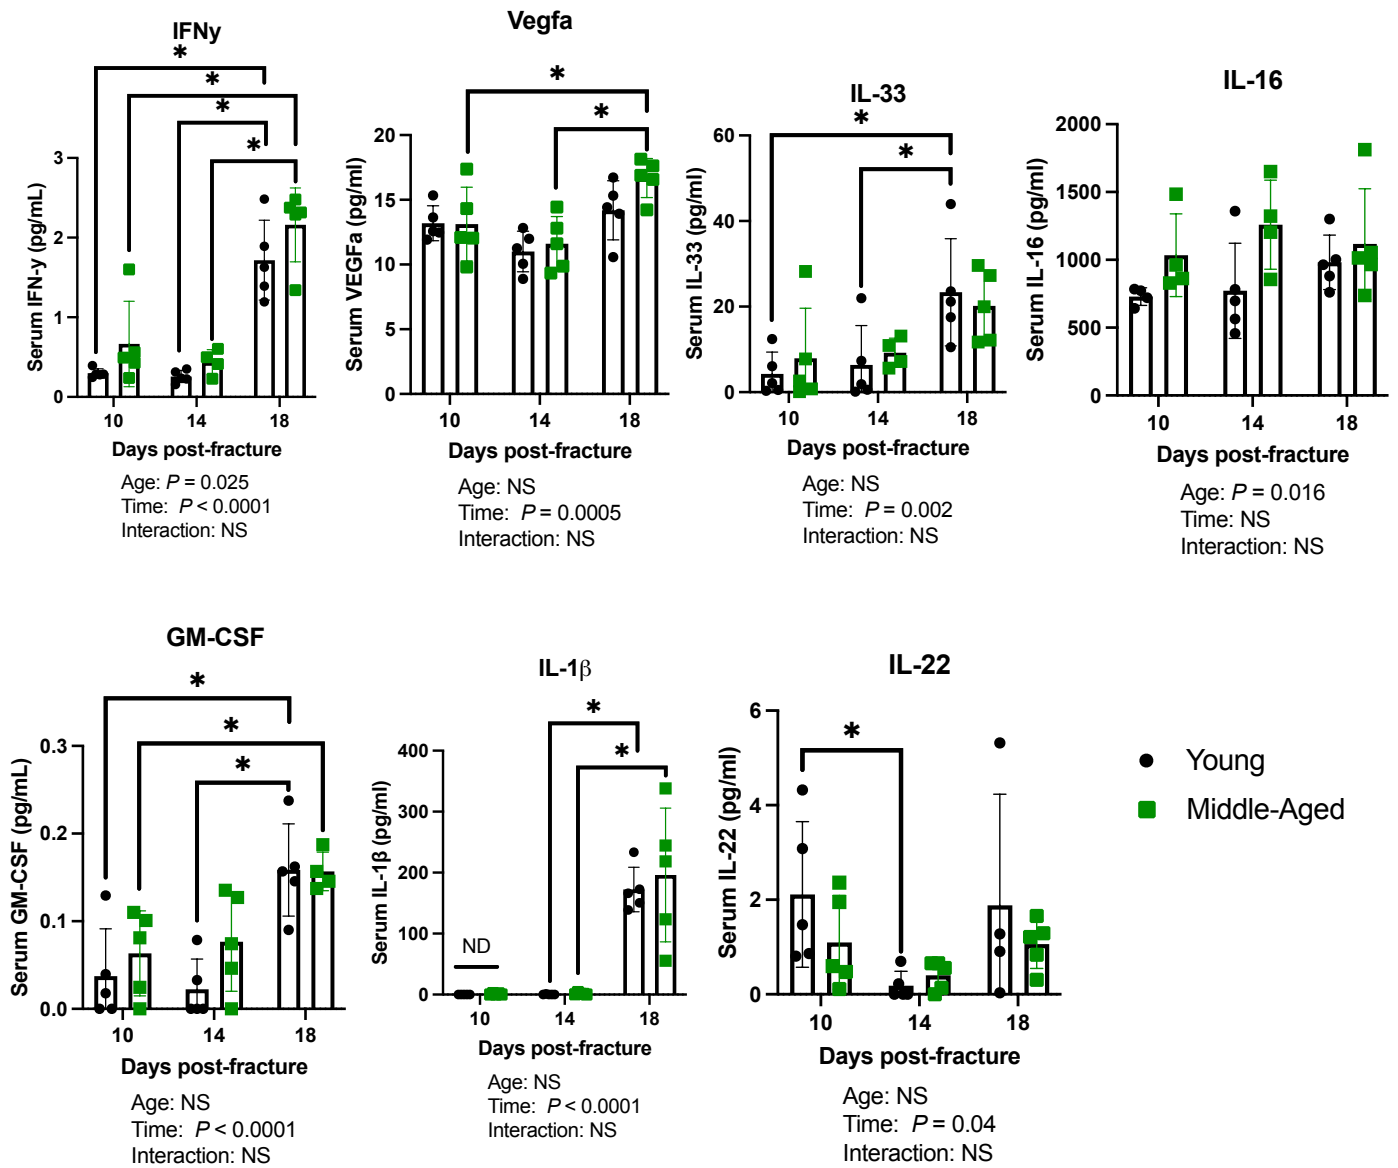

**Supplementary Figure 1. Changes in serum cytokines after fracture.** Data represent mean  $\pm$  SD. Two-way ANOVA followed by Sidak multiple comparisons test.  $*P < 0.05$ .

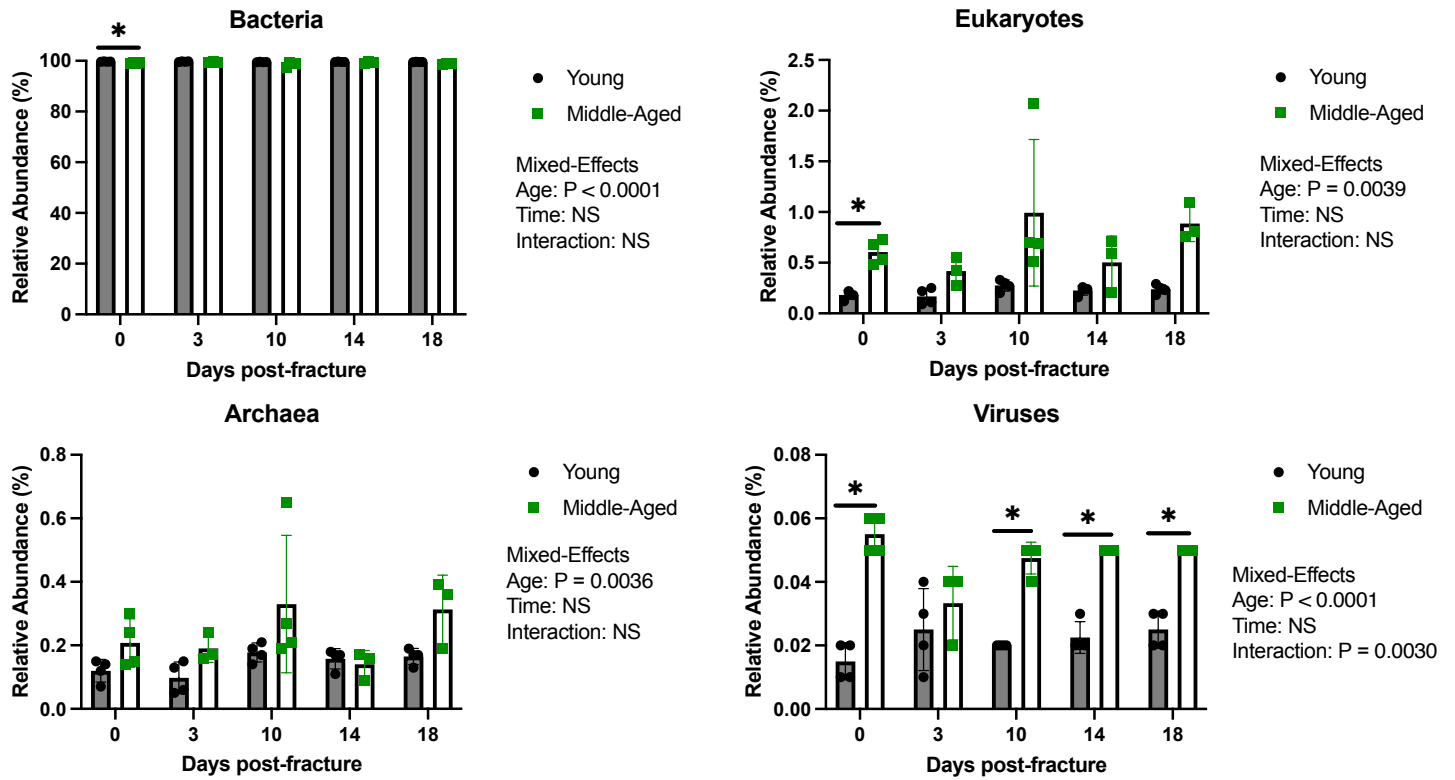

**Supplementary Figure 2. Changes in Kingdom level features during fracture healing.** Data represent mean  $\pm$  SD,  $*P < 0.05$  vs. young mice.
